# Supplementary material for: The Association between Blood Pressure Trajectories and Risk of Cardiovascular Diseases among Non-Hypertensive Chinese Population: A Population-Based Cohort Study
Source: MDPI journal article supplement (doi:10.3390/ijerph18062909), 2021-03-12
Supplement: s1 [file s1]

**Table S1.** Fit indices for growth mixture models for blood pressure and stroke and MI among Chinese adults.

| Outcomes | Variable | Classes  | K         | G <sup>2</sup> /LL | aBIC             | Entropy      | aLMR          | BLRT             | Classification Probability     | Class Counts                   |
|----------|----------|----------|-----------|--------------------|------------------|--------------|---------------|------------------|--------------------------------|--------------------------------|
| Stroke   | SBP      | 2        | 16        | -34602.882         | 69282.359        | 0.716        | <0.001        | <0.001           | 2360/517                       | 0.8203/0.1797                  |
|          |          | <b>3</b> | <b>21</b> | <b>-34489.097</b>  | <b>69078.724</b> | <b>0.641</b> | <b>0.0845</b> | <b>&lt;0.001</b> | <b>277/1713/887</b>            | <b>0.09628/0.59541/0.30831</b> |
|          |          | 4        | 26        | -34490.281         | 69105.028        | 0.713        | 0.6711        | 1                | 1605/147/0/1125                | 0.55787/0.05109/0/0.39103      |
|          | DBP      | 2        | 16        | -31364.344         | 62805.282        | 0.541        | <0.001        | <0.001           | 1767/1110                      | 0.61418/0.38582                |
|          |          | <b>3</b> | <b>21</b> | <b>-31327.552</b>  | <b>62755.633</b> | <b>0.666</b> | <b>0.0032</b> | <b>&lt;0.001</b> | <b>1793/1035/49</b>            | <b>0.62322/0.35975/0.01703</b> |
|          |          | 4        | 26        | -31327.552         | 62779.569        | 0.735        | 0.4997        | 0.9934           | 1035/0/1793/49                 | 0.35975/0/0.62322/0.01703      |
| MI       | SBP      | 2        | 14        | -34779.728         | 69626.486        | 0.672        | <0.001        | <0.001           | 0.74679/0.25321                | 2150/729                       |
|          |          | <b>3</b> | <b>20</b> | <b>-34631.418</b>  | <b>69358.593</b> | <b>0.663</b> | <b>0.0114</b> | <b>&lt;0.001</b> | <b>0.49844/0.07468/0.42688</b> | <b>1435/215/1229</b>           |
|          |          | 4        | 26        | -34616.125         | 69356.735        | 0.733        | 0.1583        | <0.001           | 0.01077/0.47378/0.4446/0.07086 | 31/1364/1280/204               |
|          | DBP      | 5        | 32        | -34631.418         | 69416.047        | 0.77         | 0.2398        | 1.000            | 0.07468/0.49844/0.42688/0/0    | 215/1435/1229/0/0              |
|          |          | 2        | 14        | -31469.568         | 63006.165        | 0.577        | <0.001        | <0.001           | 0.59917/0.40083                | 1725/1154                      |
|          |          | <b>3</b> | <b>20</b> | <b>-31436.085</b>  | <b>62967.927</b> | <b>0.7</b>   | <b>0.0512</b> | <b>&lt;0.001</b> | <b>0.33067/0.16985/0.49948</b> | <b>952/489/1438</b>            |
|          |          | 4        | 26        | -31406.794         | 62938.073        | 0.732        | 0.1965        | <0.001           | 0.1563/0.01146/0.37721/0.45502 | 450/33/1086/1310               |
|          |          | 5        | 32        | -31436.085         | 63025.381        | 0.795        | 0.5513        | 1                | 0/0.16985/0.33067/0/0.49948    | 0/489/952/0/1438               |

The best-fitting models were presented in bold. Abbreviation: MI, myocardial infarction; SBP, systolic blood pressure; DBP, diastolic blood pressure; G<sup>2</sup>/LL, likelihood ratio chi-square; aBIC, sample size-adjusted Bayesian Information Criterion; aLMR, adjusted Lo–Mendell–Rubin likelihood ratio test; BLRT, bootstrapped likelihood ratio test.

**Table S2.** The associations between blood pressure trajectories and stroke or MI by cox regressions eliminating participants without missing values.

| Outcomes | Classes of Trajectories | Event   | n  | Incidence Density <sup>a</sup> | Crude Model |        |              | Adjusted Model 1 <sup>b</sup> |        |              | Adjusted Model 2 <sup>c</sup> |        |              |        |
|----------|-------------------------|---------|----|--------------------------------|-------------|--------|--------------|-------------------------------|--------|--------------|-------------------------------|--------|--------------|--------|
|          |                         |         |    |                                | HR          | 95% CI | P            | HR                            | 95% CI | P            | HR                            | 95% CI | P            |        |
| Stroke   | SBP                     | Class 3 | 3  | 887                            | 0.063       | Ref.   |              |                               | Ref.   |              |                               |        |              |        |
|          |                         | Class 1 | 15 | 277                            | 1.015       | 16.400 | 4.748–56.648 | <0.001                        | 4.513  | 1.120–18.187 | 0.034                         | 4.513  | 1.120–18.187 | 0.034  |
|          |                         | Class 2 | 26 | 1713                           | 0.282       | 4.513  | 1.366–14.910 | 0.013                         | 1.680  | 0.462–6.114  | 0.431                         | 1.680  | 0.462–6.114  | 0.431  |
|          | DBP                     | Class 1 | 6  | 1035                           | 0.107       | Ref.   |              |                               | -      |              |                               | -      |              |        |
|          |                         | Class 2 | 38 | 1793                           | 0.395       | 3.685  | 1.558–8.718  | 0.003                         | -      |              |                               | -      |              |        |
|          |                         | Class 3 | 0  | 49                             | 0           | -      | -            | -                             | -      |              |                               | -      |              |        |
| MI       | SBP                     | Class 3 | 4  | 1229                           | 0.060       | Ref.   |              |                               | Ref.   |              |                               |        |              |        |
|          |                         | Class 1 | 28 | 1435                           | 0.362       | 5.841  | 2.044–16.693 | 0.001                         | 5.841  | 2.044–16.693 | 0.001                         | 5.841  | 2.044–16.693 | 0.001  |
|          |                         | Class 2 | 9  | 215                            | 0.778       | 13.385 | 4.122–43.463 | 0.000                         | 13.320 | 4.102–43.252 | <0.001                        | 13.320 | 4.102–43.252 | <0.001 |
|          | DBP                     | Class 3 | 1  | 498                            | 0.038       | Ref.   |              |                               | -      |              |                               | -      |              |        |
|          |                         | Class 1 | 25 | 952                            | 0.488       | 12.996 | 1.761–95.913 | 0.012                         | -      |              |                               | -      |              |        |
|          |                         | Class 2 | 15 | 1438                           | 0.193       | 5.118  | 0.676–38.742 | 0.114                         | -      |              |                               | -      |              |        |

Abbreviation: MI, myocardial infarction; SBP, systolic blood pressure; DBP, diastolic blood pressure; HR, hazard ratio; 95% CI, 95% confidence interval. <sup>a</sup> Provided as event/1000 person-years. <sup>b</sup> The model was adjusted for age level in 2006, location, ethnicity, gender, education level, smoking in 2006, current smoking in 2006, drinking in 2006, BMI category in 2006, energy intake in 2006, and activity level in 2006. Variables were selected by the forward method (likelihood ratio). <sup>c</sup> The model was adjusted for age level in 2006, location, ethnicity, gender, education level, smoking in 2006, current smoking in 2006, drinking in 2006, BMI category in 2006, energy intake in 2006, and activity level in 2006, and classification of diastolic blood pressure trajectories. Variables were selected by the forward method (likelihood ratio).

**Table S3.** The associations between 2-class and 4-class blood pressure trajectories and stroke or MI by cox regressions.

| Outcomes | Class Type | Classes of Trajectories | Event   | n      | Incidence Density <sup>a</sup> | Crude Model |        |              | Adjusted Model 1 <sup>b</sup> |        |             | Adjusted Model 2 <sup>c</sup> |        |             |        |
|----------|------------|-------------------------|---------|--------|--------------------------------|-------------|--------|--------------|-------------------------------|--------|-------------|-------------------------------|--------|-------------|--------|
|          |            |                         |         |        |                                | HR          | 95% CI | P            | HR                            | 95% CI | P           | HR                            | 95% CI | P           |        |
| Stroke   | SBP        | 2 class                 | Class 1 | 19     | 2360                           | 0.897       | Ref.   |              |                               | Ref.   |             |                               |        |             |        |
|          |            |                         | Class 2 | 25     | 517                            | 5.425       | 6.113  | 3.367–11.101 | <0.001                        | 3.495  | 1.729–7.064 | <0.001                        | 3.596  | 1.777–7.277 | <0.001 |
|          |            | 4 class <sup>d</sup>    | Class 1 | 10     | 1605                           | 0.693       | Ref.   |              |                               | Ref.   |             |                               |        |             |        |
|          |            |                         | Class 2 | 8      | 147                            | 6.135       | 8.965  | 3.538–22.716 | <0.001                        | 2.692  | 0.905–8.012 | 0.075                         | 2.692  | 0.905–8.012 | 0.075  |
|          | DBP        | 2-class                 | Class 2 | 6      | 1110                           | 0.601       | Ref.   |              |                               | -      | -           | -                             | -      | -           | -      |
|          |            |                         | Class 1 | 38     | 1767                           | 2.403       | 4.012  | 1.696–9.490  | 0.002                         | -      | -           | -                             | -      | -           | -      |
|          |            | 4-class <sup>e</sup>    | Class 1 | 6      | 1035                           | 0.645       | Ref.   |              |                               | -      | -           | -                             | -      | -           | -      |
|          |            |                         | Class 3 | 38     | 1793                           | 2.368       | 3.685  | 1.558–8.718  | 0.003                         | -      | -           | -                             | -      | -           | -      |
|          |            |                         | Class 4 | 0      | 49                             | 0.000       | -      | -            | -                             | -      | -           | -                             | -      | -           | -      |
|          |            |                         | Class 4 | 0      | 49                             | 0.000       | -      | -            | -                             | -      | -           | -                             | -      | -           | -      |
| MI       | SBP        | 2-class                 | Class 1 | 21     | 2150                           | 1.086       | Ref.   |              |                               | -      | -           | -                             | -      | -           |        |
|          |            |                         | Class 2 | 20     | 729                            | 3.063       | 2.837  | 1.538–5.234  | 0.001                         | -      | -           | -                             | -      | -           |        |
|          |            | 4-class                 | Class 3 | 6      | 1280                           | 0.521       | Ref.   |              |                               | -      | -           | -                             | -      | -           |        |
|          |            |                         | Class 1 | 0      | 31                             | 0.000       | -      | -            | -                             | -      | -           | -                             | -      | -           |        |
|          |            |                         | Class 2 | 27     | 1364                           | 2.206       | 4.261  | 1.759–10.321 | 0.001                         | -      | -           | -                             | -      | -           |        |
|          | DBP        | 2-class                 | Class 4 | 8      | 204                            | 4.374       | 8.473  | 2.940–24.420 | <0.001                        | -      | -           | -                             | -      | -           |        |
|          |            |                         | Class 1 | 15     | 1725                           | 0.967       | Ref.   |              |                               | -      | -           | -                             | -      | -           |        |
|          |            | 4-calss                 | Class 2 | 26     | 1154                           | 2.513       | 2.613  | 1.384–4.933  | 0.003                         | -      | -           | -                             | -      | -           |        |
|          |            |                         | Class 1 | 1      | 450                            | 0.247       | Ref.   |              |                               | -      | -           | -                             | -      | -           |        |
|          |            |                         | Class 2 | 2      | 33                             | 6.780       | 27.914 | 2.531–307.84 | 0.007                         | -      | -           | -                             | -      | -           |        |
| Class 3  | 24         | 1086                    | 2.465   | 10.051 | 1.360–74.296                   | 0.024       | -      | -            | -                             | -      | -           |                               |        |             |        |
| Class 4  | 14         | 1310                    | 1.188   | 4.823  | 0.634–36.679                   | 0.128       | -      | -            | -                             | -      | -           |                               |        |             |        |

Abbreviation: MI, myocardial infarction; SBP, systolic blood pressure; DBP, diastolic blood pressure; HR, hazard ratio; 95% CI, 95% confidence interval. <sup>a</sup> Provided as event/1000 person-years. <sup>b</sup> The model was adjusted for age level in 2006, location, ethnicity, gender, education level, smoking in 2006, current smoking in 2006, drinking in 2006, BMI category in 2006, energy intake in 2006, and activity level in 2006. Variables were selected by the forward method (likelihood ratio). <sup>c</sup> The model was adjusted for age level in 2006, location, ethnicity, gender, education level, smoking in 2006, current smoking in 2006, drinking in 2006, BMI category in 2006, energy intake in 2006, and activity level at 2006, and corresponding classification of diastolic blood pressure trajectories. Variables were selected by the forward method (likelihood ratio). <sup>d</sup> The count of Class 3 was zero. <sup>e</sup> The count of Class 2 was zero.

**Table S4.** The associations between the age-stratified blood pressure trajectories and stroke or MI by cox regressions.

| Outcomes | Age | Classes of Trajectories | Event   | n  | Incidence Density <sup>a</sup> | Crude Model |        |               | Adjusted Model 1 <sup>b</sup> |        |               | Adjusted Model 2 <sup>c</sup> |        |               |       |   |
|----------|-----|-------------------------|---------|----|--------------------------------|-------------|--------|---------------|-------------------------------|--------|---------------|-------------------------------|--------|---------------|-------|---|
|          |     |                         |         |    |                                | HR          | 95% CI | P             | HR                            | 95% CI | P             | HR                            | 95% CI | P             |       |   |
| Stroke   | ≤50 | SBP                     | Class 3 | 0  | 31                             | 0           | -      | -             | -                             | -      | -             | -                             | -      | -             | -     |   |
|          |     |                         | Class 1 | 2  | 934                            | 0.238       | Ref.   | -             | -                             | -      | -             | -                             | -      | -             | -     | - |
|          |     |                         | Class 2 | 5  | 549                            | 1.016       | 4.265  | 0.827–21.982  | 0.083                         | -      | -             | -                             | -      | -             | -     | - |
|          | >50 | SBP                     | Class 3 | 14 | 531                            | 2.948       | Ref.   | -             | -                             | -      | -             | -                             | -      | -             | -     | - |
|          |     |                         | Class 1 | 2  | 67                             | 3.328       | 1.133  | 0.258–4.985   | 0.869                         | -      | -             | -                             | -      | -             | -     | - |
|          |     |                         | Class 2 | 21 | 765                            | 3.068       | 1.040  | 0.529–2.046   | 0.909                         | -      | -             | -                             | -      | -             | -     | - |
|          | ≤50 | DBP                     | Class 3 | 1  | 618                            | 0.180       | Ref.   | -             | -                             | Ref.   | -             | -                             | Ref.   | -             | -     | - |
|          |     |                         | Class 1 | 2  | 135                            | 1.667       | 18.486 | 2.066–165.394 | 0.009                         | 18.486 | 2.066–165.394 | 0.009                         | 18.486 | 2.066–165.394 | 0.009 |   |
|          |     |                         | Class 2 | 4  | 761                            | 0.585       | 1.624  | 0.147–17.908  | 0.692                         | 1.624  | 0.147–17.908  | 0.692                         | 1.624  | 0.147–17.908  | 0.692 |   |
| >50      |     |                         | Class 3 | 10 | 537                            | 2.079       | Ref.   | -             | -                             | -      | -             | -                             | -      | -             | -     | - |
|          |     |                         | Class 1 | 8  | 312                            | 2.865       | 1.380  | 0.545–3.498   | 0.497                         | -      | -             | -                             | -      | -             | -     | - |
|          |     |                         | Class 2 | 19 | 514                            | 4.138       | 2.001  | 0.931–4.304   | 0.076                         | -      | -             | -                             | -      | -             | -     | - |
| MI       | ≤50 | SBP                     | Class 3 | 1  | 631                            | 0.176       | Ref.   | -             | -                             | Ref.   | -             | -                             | Ref.   | -             | -     |   |
|          |     |                         | Class 1 | 3  | 131                            | 2.549       | 45.743 | 4.758–439.751 | 0.001                         | 44.305 | 4.607–426.110 | 0.001                         | 44.305 | 4.607–426.110 | 0.001 |   |
|          |     |                         | Class 2 | 5  | 753                            | 0.738       | 4.833  | 0.565–41.367  | 0.150                         | 5.154  | 0.601–44.202  | 0.135                         | 5.154  | 0.601–44.202  | 0.135 |   |
|          | >50 | SBP                     | Class 2 | 14 | 789                            | 1.975       | Ref.   | -             | -                             | -      | -             | -                             | -      | -             | -     | - |
|          |     |                         | Class 1 | 2  | 68                             | 3.284       | 1.679  | 0.381–7.385   | 0.493                         | -      | -             | -                             | -      | -             | -     | - |
|          |     |                         | Class 3 | 16 | 507                            | 3.525       | 1.792  | 0.875–3.671   | 0.111                         | -      | -             | -                             | -      | -             | -     | - |
|          | ≤50 | DBP                     | Class 3 | 1  | 720                            | 0.154       | Ref.   | -             | -                             | Ref.   | -             | -                             | -      | -             | -     | - |
|          |     |                         | Class 1 | 3  | 48                             | 6.977       | 14.537 | 1.512–139.750 | 0.020                         | 14.340 | 1.492–137.873 | 0.021                         | -      | -             | -     | - |
|          |     |                         | Class 2 | 5  | 747                            | 0.744       | 4.202  | 0.491–35.964  | 0.190                         | 4.480  | 0.522–38.418  | 0.171                         | -      | -             | -     | - |
| >50      |     |                         | Class 1 | 7  | 418                            | 1.867       | Ref.   | -             | -                             | -      | -             | -                             | -      | -             | -     | - |
|          |     |                         | Class 2 | 17 | 567                            | 3.348       | 1.796  | 0.745–4.330   | 0.192                         | -      | -             | -                             | -      | -             | -     | - |
|          |     |                         | Class 3 | 8  | 379                            | 2.347       | 1.253  | 0.454–3.455   | 0.663                         | -      | -             | -                             | -      | -             | -     | - |

Abbreviation: MI, myocardial infarction; SBP, systolic blood pressure; DBP, diastolic blood pressure; HR, hazard ratio; 95% CI, 95% confidence interval. <sup>a</sup> Provided as event/1000 person-years. <sup>b</sup> The model was adjusted for age level in 2006, location, ethnicity, gender, education level, smoking in 2006, current smoking in 2006, drinking in 2006, BMI category in 2006, energy intake in 2006, and activity level in 2006. Variables were selected by the forward method (likelihood ratio). <sup>c</sup> The model was adjusted for age level in 2006, location, ethnicity, gender, education level, smoking in 2006, current smoking in 2006, drinking in 2006, BMI category in 2006, energy intake in 2006, and activity level in 2006, and corresponding classification of diastolic blood pressure trajectories. Variables were selected by the forward method (likelihood ratio).

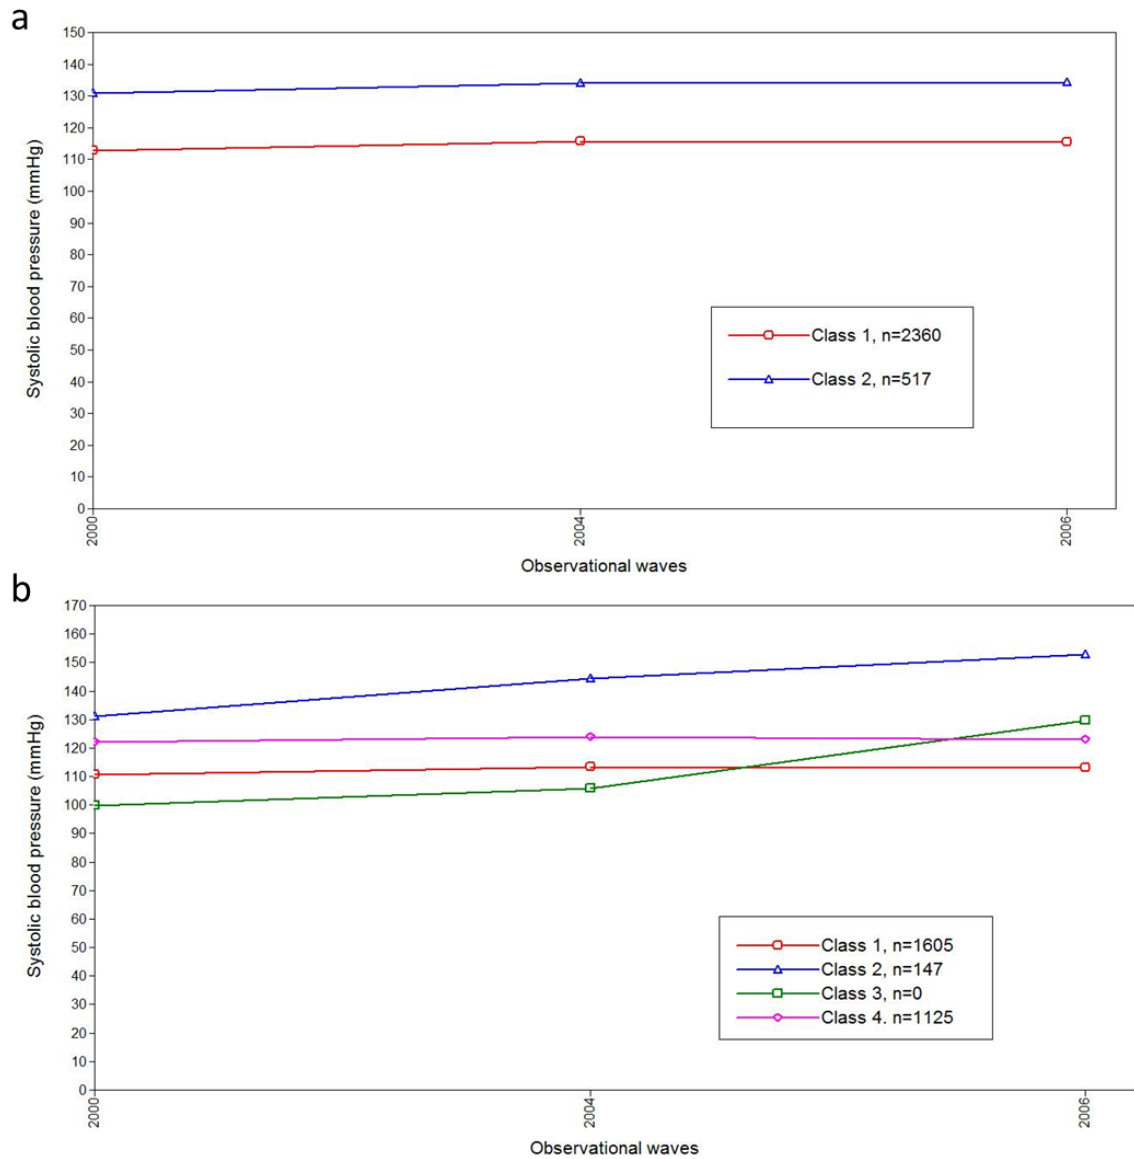

**Figure S1.** The blood pressure trajectories in the 2-class and 4-class models of systolic blood pressure by GMM for stroke. **(a)** The plots of 2-class systolic blood pressure trajectories by GMM for stroke. **(b)** The plots of 4-class systolic blood pressure trajectories by GMM for stroke. Abbreviations: mmHg, millimeter of mercury; GMM, growth mixture model.

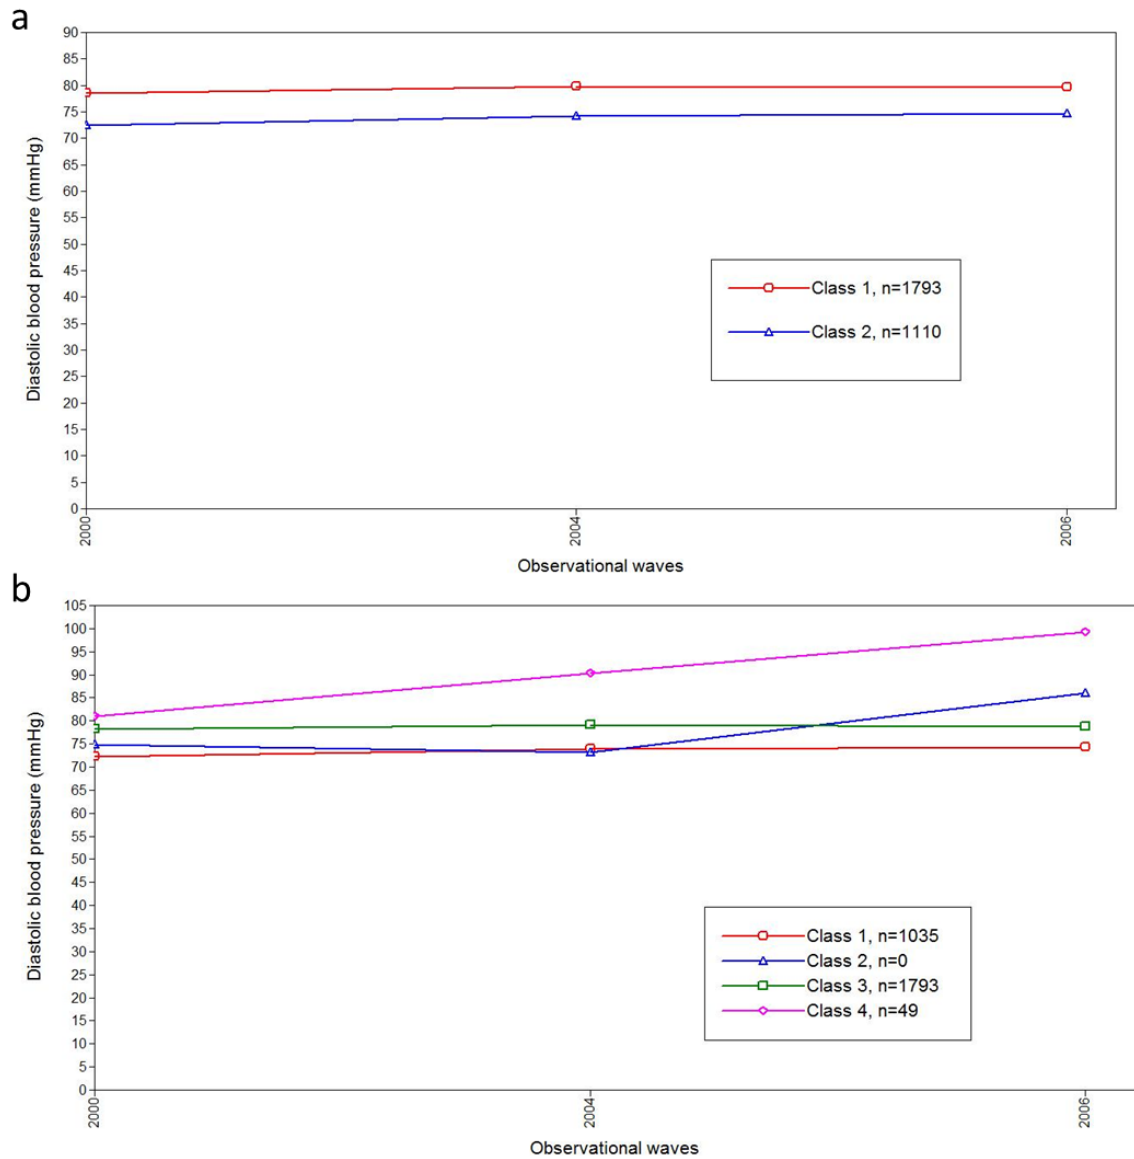

**Figure S2.** The blood pressure trajectories in the 2-class and 4-class models of diastolic blood pressure by GMM for stroke. **(a)** The plots of 2-class diastolic blood pressure trajectories by GMM for stroke. **(b)** The plots of 4-class diastolic blood pressure trajectories by GMM for stroke. Abbreviations: mmHg, millimeter of mercury; GMM, growth mixture model.

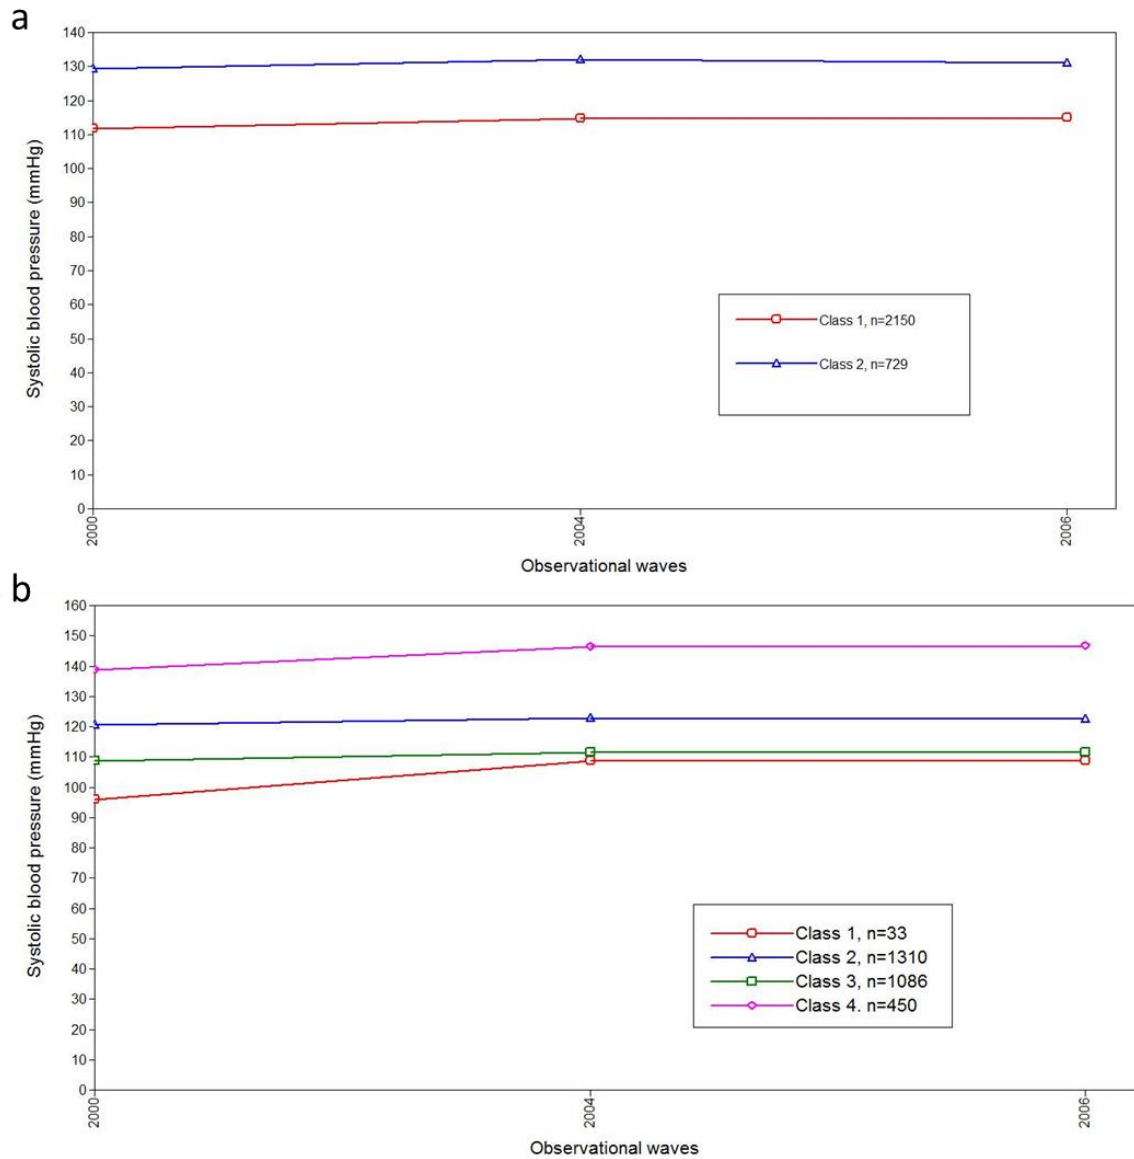

**Figure S3.** The blood pressure trajectories in the 2-class and 4-class models of systolic blood pressure by GMM for myocardial infarction. **(a)** The plots of 2-class systolic blood pressure trajectories by GMM for myocardial infarction. **(b)** The plots of 4-class systolic blood pressure trajectories by GMM for myocardial infarction. Abbreviations: mmHg, millimeter of mercury; GMM, growth mixture model.

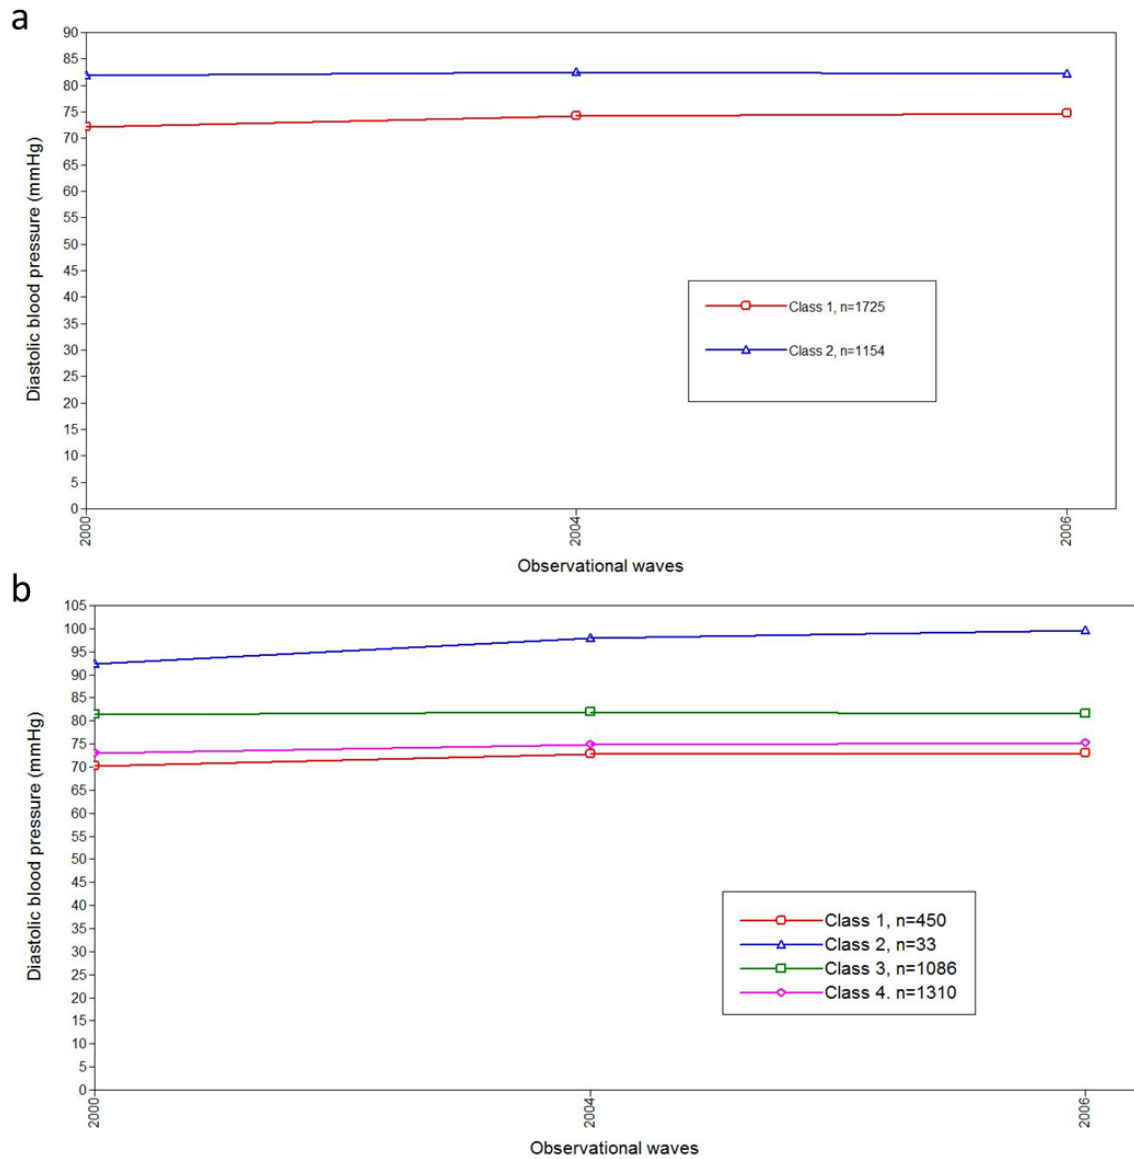

**Figure S4.** The blood pressure trajectories in the 2-class and 4-class models of diastolic blood pressure by GMM for myocardial infarction. **(a)** The plots of 2-class diastolic blood pressure trajectories by GMM for myocardial infarction. **(b)** The plots of 4-class diastolic blood pressure trajectories by GMM for myocardial infarction. Abbreviations: mmHg, millimeter of mercury; GMM, growth mixture model.



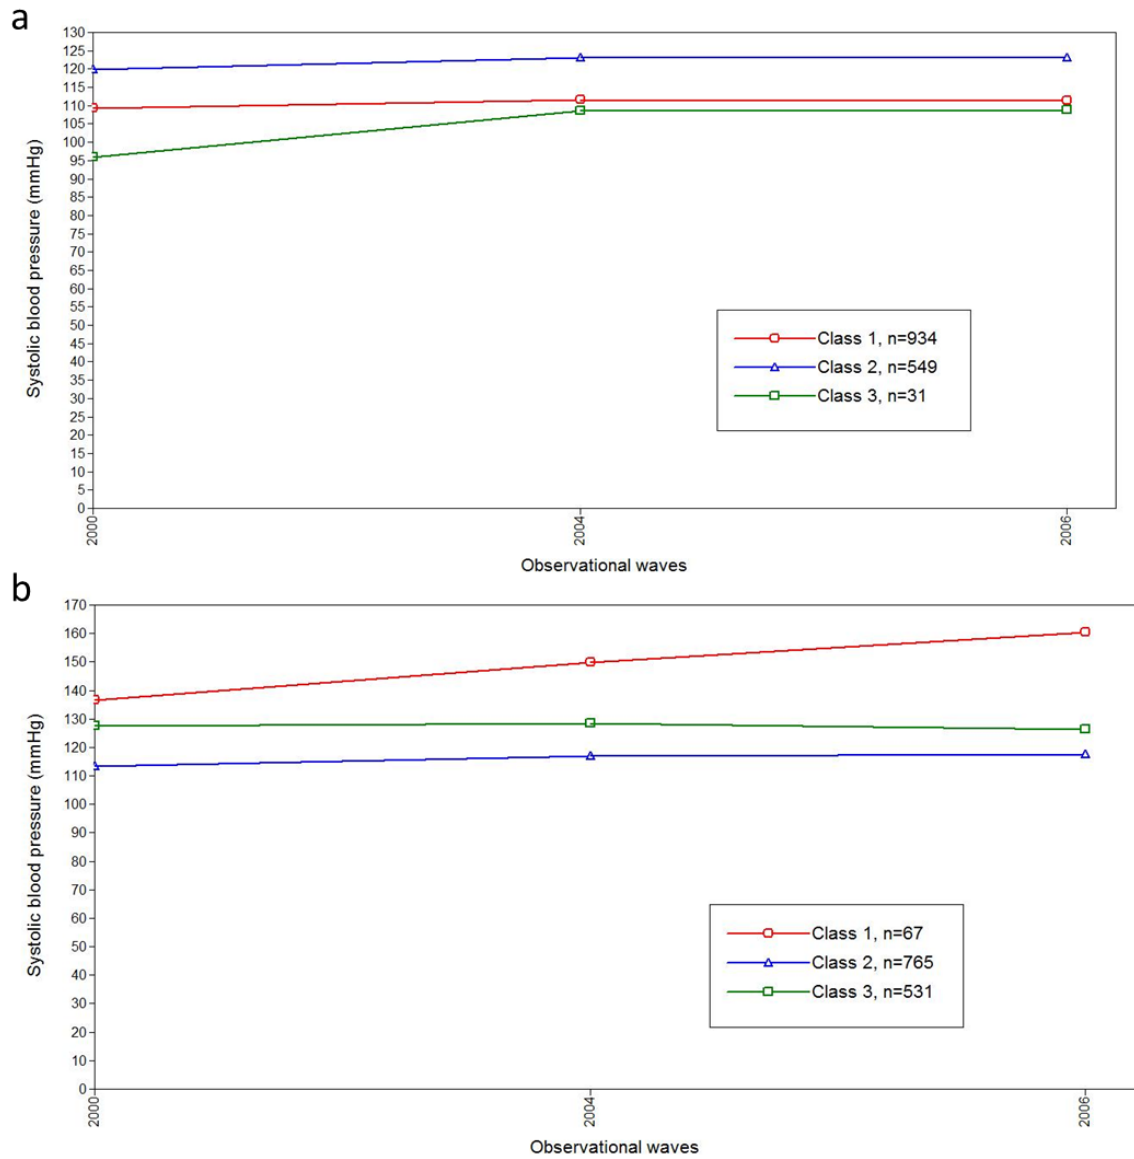

**Figure S5.** The blood pressure trajectories in the 3-class model of systolic blood pressure by GMM for stroke, age-stratified. (a) The plots of 3-class systolic blood pressure trajectories by GMM for stroke, aged 50 and below. (b) The plots of 3-class systolic blood pressure trajectories by GMM for stroke, aged above 50. Abbreviations: mmHg, millimeter of mercury; GMM, growth mixture model.

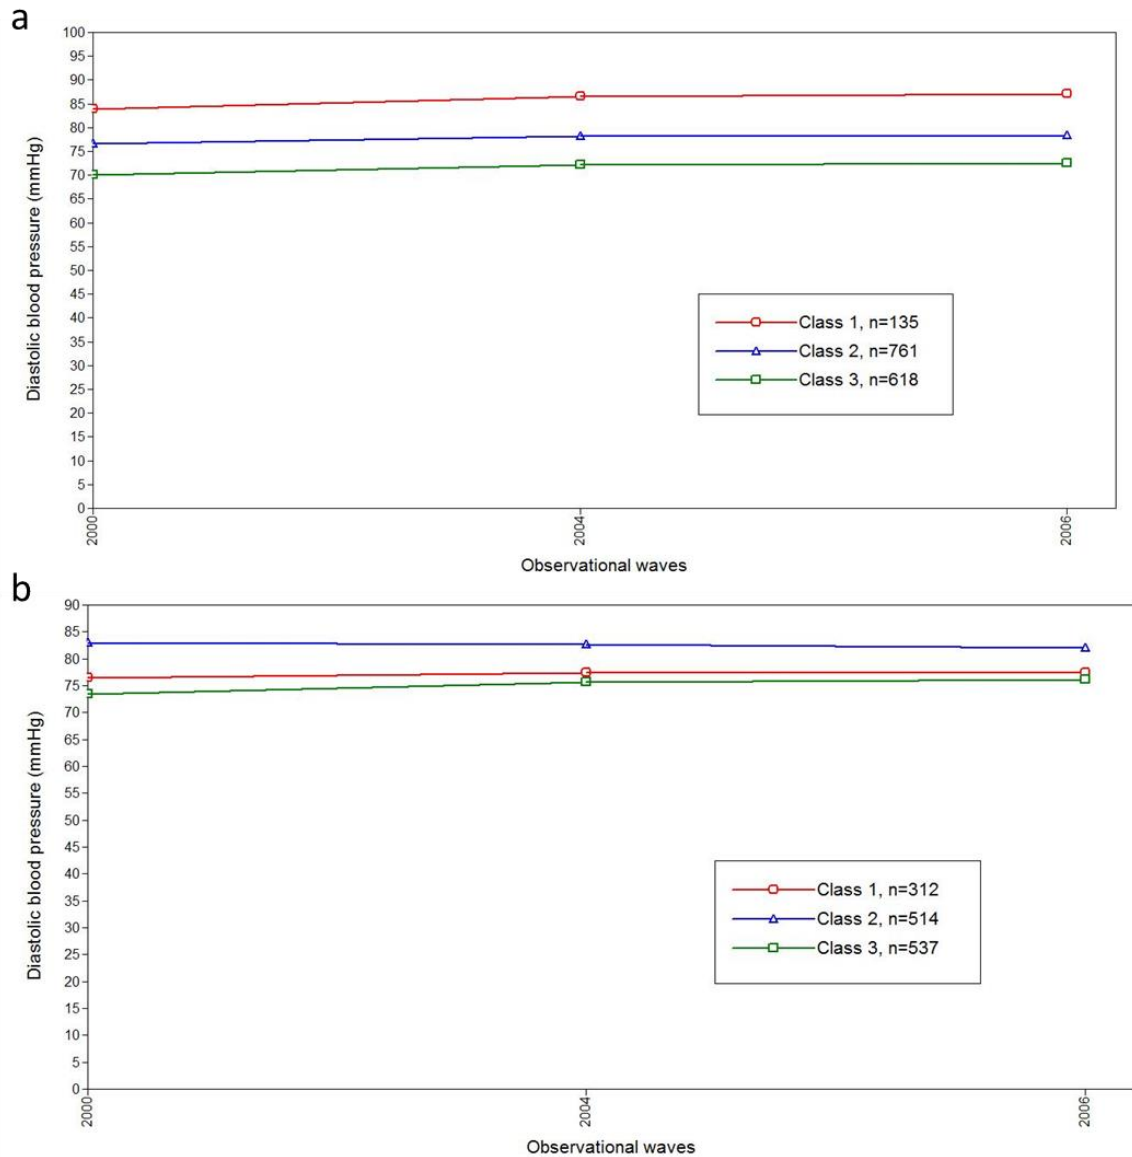

**Figure S6.** The blood pressure trajectories in the 3-class model of diastolic blood pressure by GMM for stroke, age-stratified. (a) The plots of 3-class diastolic blood pressure trajectories by GMM for stroke, aged 50 and below. (b) The plots of 3-class diastolic blood pressure trajectories by GMM for stroke, aged above 50. Abbreviations: mmHg, millimeter of mercury; GMM, growth mixture model.

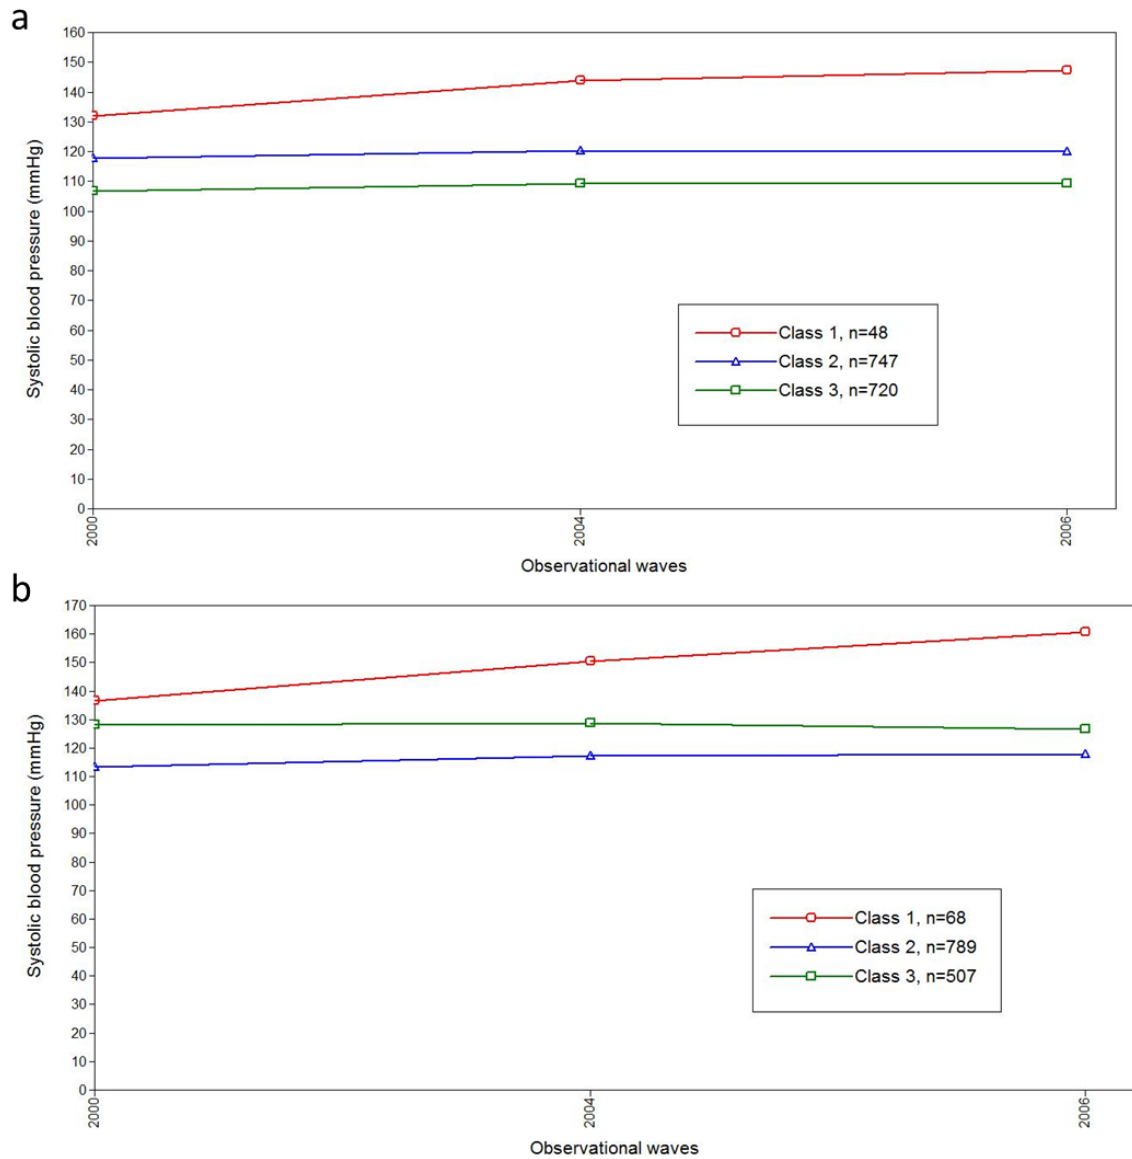

**Figure S7.** The blood pressure trajectories in the 3-class model of systolic blood pressure by GMM for myocardial infarction, age-stratified. **(a)** The plots of 3-class systolic blood pressure trajectories by GMM for myocardial infarction, aged 50 and below. **(b)** The plots of 3-class systolic blood pressure trajectories by GMM for myocardial infarction, aged above 50. Abbreviations: mmHg, millimeter of mercury; GMM, growth mixture model.

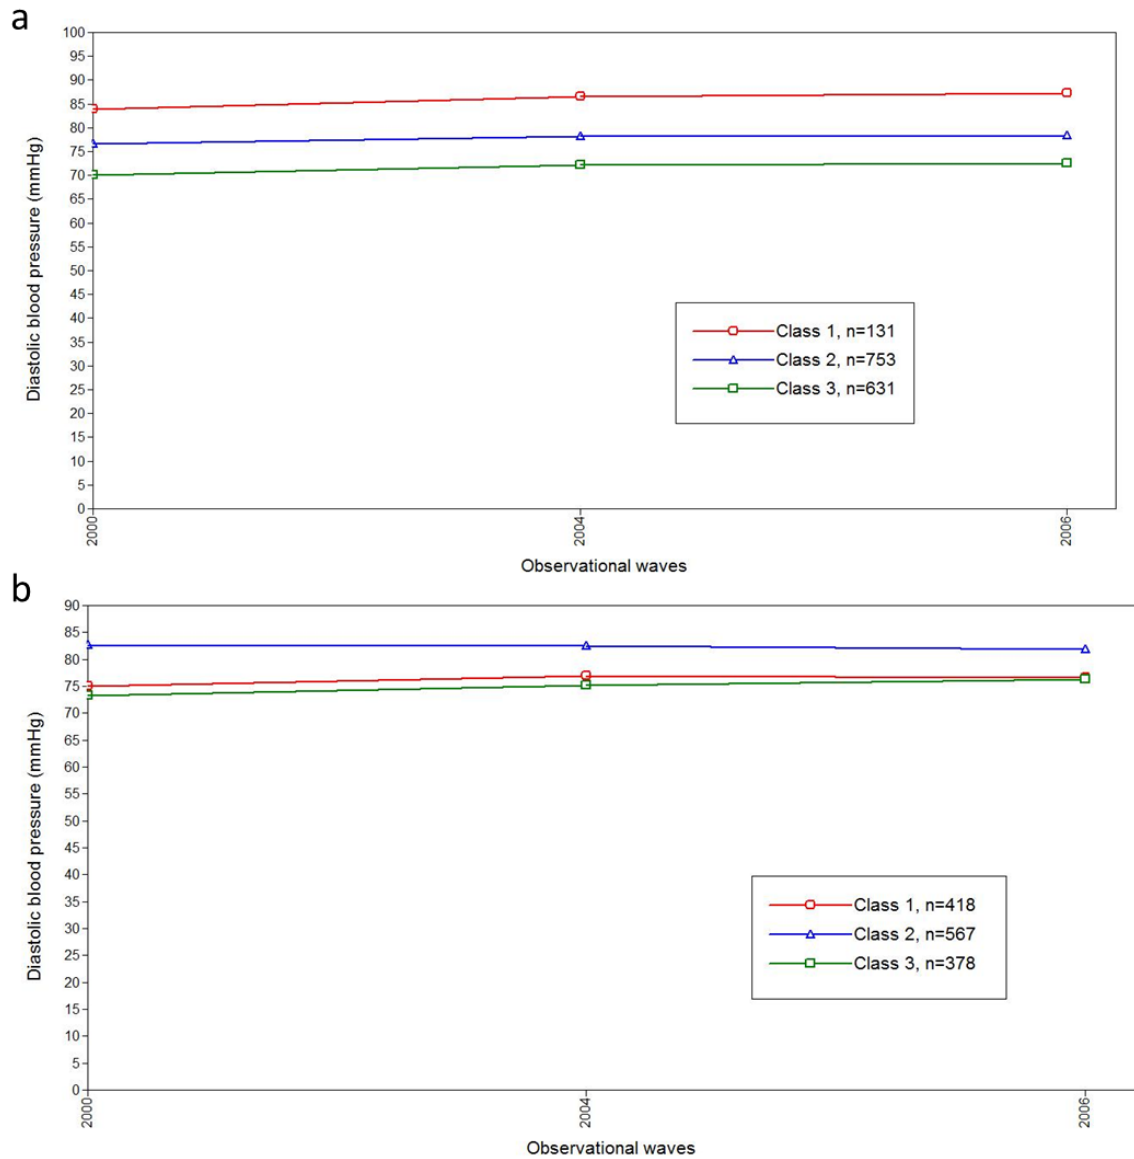

**Figure S8.** The blood pressure trajectories in the 3-class model of diastolic blood pressure by GMM for MI, age-stratified. **(a)** The plots of 3-class diastolic blood pressure trajectories by GMM for myocardial infarction, aged 50 and below. **(b)** The plots of 3-class diastolic blood pressure trajectories by GMM for myocardial infarction, aged above 50. Abbreviations: mmHg, millimeter of mercury; GMM, growth mixture model.
